# Supplementary material for: Adverse Drug Reactions and Potentially Inappropriate Medication in Older Patients: Analysis of the Portuguese Pharmacovigilance Database
Source: MDPI journal article supplement (doi:10.3390/jcm11082229), 2022-04-15
Supplement: s1 [file s1]

## Supplementary Material

Table S1. Application of the American Geriatrics Society 2019 Updated AGS Beers Criteria® for Potentially Inappropriate Medication Use in Older Adults in the study.

|                                      | Group/Medicines                                                                                                                                                                                                         | Application of criteria                                                                         |
|--------------------------------------|-------------------------------------------------------------------------------------------------------------------------------------------------------------------------------------------------------------------------|-------------------------------------------------------------------------------------------------|
| <b>Drugs To Be Used With Caution</b> | Aspirin for primary prevention of cardiovascular disease and colorectal cancer                                                                                                                                          | Not applied, as clinical information was needed                                                 |
|                                      | Dabigatran, Rivaroxaban                                                                                                                                                                                                 | Not applied, as clinical information was needed                                                 |
|                                      | Prasugrel                                                                                                                                                                                                               | Not applied, as clinical information was needed                                                 |
|                                      | Antipsychotics, Carbamazepine, Diuretics, Mirtazapine Oxcarbazepine, SNRIs, SSRIs, TCAs, Tramadol                                                                                                                       | Not applied, as use with caution recommendation would need clinical data that was not available |
|                                      | Dextromethorphan/ quinidine                                                                                                                                                                                             | Not applied, as clinical information was needed                                                 |
|                                      | Trimethoprim-sulfamethoxazole                                                                                                                                                                                           | Not applied, as clinical information was needed                                                 |
| <b>Drug-Drug Interactions</b>        | RAS inhibitor – RAS inhibitor                                                                                                                                                                                           | Not applied, as clinical information was needed                                                 |
|                                      | Opioids - Benzodiazepines                                                                                                                                                                                               | Applied                                                                                         |
|                                      | Opioids - Gabapentin, pregabalin                                                                                                                                                                                        | Not applied, as clinical information was needed                                                 |
|                                      | Anticholinergic - Anticholinergic                                                                                                                                                                                       | Applied                                                                                         |
|                                      | Any combination of three or more of Antidepressants (TCAs, SSRIs, and SNRIs), Antipsychotics, Antiepileptics, Benzodiazepines and nonbenzodiazepine, benzodiazepine receptor agonist hypnotics (ie, “Z-drugs”), Opioids | Applied                                                                                         |
|                                      | Corticosteroids, oral or parenteral - NSAIDs                                                                                                                                                                            | Applied                                                                                         |
|                                      | Lithium - ACEIs                                                                                                                                                                                                         | Applied                                                                                         |
|                                      | Lithium - Loop diuretics                                                                                                                                                                                                | Applied                                                                                         |
|                                      | Peripheral $\alpha$ -1 blockers - Loop diuretics                                                                                                                                                                        | Not applied, as clinical information was needed                                                 |
|                                      | Phenytoin - Trimethoprim-sulfamethoxazole                                                                                                                                                                               | Applied                                                                                         |
|                                      | Theophylline - Cimetidine                                                                                                                                                                                               | Applied                                                                                         |
|                                      | Theophylline - Ciprofloxacin                                                                                                                                                                                            | Applied                                                                                         |
|                                      | Warfarin - Amiodarone                                                                                                                                                                                                   | Not applied, as for exception clinical data was needed                                          |
|                                      | Warfarin - Ciprofloxacin                                                                                                                                                                                                | Not applied, as for exception clinical data was needed                                          |
|                                      | Warfarin - Macrolides (excluding azithromycin)                                                                                                                                                                          | Not applied, as for exception clinical data was needed                                          |
|                                      | Warfarin - Trimethoprim-sulfamethoxazole                                                                                                                                                                                | Not applied, as for exception clinical data was needed                                          |
|                                      | Warfarin - NSAIDs                                                                                                                                                                                                       | Not applied, as for exception clinical data was needed                                          |
| <b>Drug-disease interaction</b>      |                                                                                                                                                                                                                         | Not applied as clinical information was needed                                                  |

|                                                     |                                                                              |                                                                                                                                                                    |
|-----------------------------------------------------|------------------------------------------------------------------------------|--------------------------------------------------------------------------------------------------------------------------------------------------------------------|
| <b>PIM Based on Kidney Function</b>                 | Not applied as clinical information was needed                               |                                                                                                                                                                    |
| <b>Drugs With Strong Anticholinergic Properties</b> | Applied                                                                      |                                                                                                                                                                    |
| <b>Pottentially Innappropriate medication</b>       | Anticholinergics                                                             | Applied                                                                                                                                                            |
|                                                     | Antiparkinsonian agents                                                      | Not applied, as clinical information was needed                                                                                                                    |
|                                                     | Antispasmodics                                                               | Applied                                                                                                                                                            |
|                                                     | Antithrombotics                                                              | Applied when type of administration available                                                                                                                      |
|                                                     | Anti-infective                                                               | Applied                                                                                                                                                            |
|                                                     | Cardiovascular                                                               | Applied expect when clinical was need: exclusion of Digoxin, Dronedarone, Amiodarone                                                                               |
|                                                     | Antidepressants, alone or in combination                                     | Applied                                                                                                                                                            |
|                                                     | Antipsychotics, first (conventional) and second (atypical) generation        | Not applied, as clinical was needed                                                                                                                                |
|                                                     | Barbiturates                                                                 | Applied                                                                                                                                                            |
|                                                     | Benzodiazepines                                                              | Applied                                                                                                                                                            |
|                                                     | Meprobamate                                                                  | Applied                                                                                                                                                            |
|                                                     | Nonbenzodiazepine, benzodiazepine receptor agonist hypnotics (ie, "Z-drugs") | Applied                                                                                                                                                            |
|                                                     | Ergoloid mesylates (dehydrogenated ergot alkaloids)<br>Isoxsuprine           | Applied                                                                                                                                                            |
|                                                     | Endocrine                                                                    | Applied, expept when clinical information was needed: exclusion of Androgens, Estrogens, Growth Hormone, Insulin sliding scale,                                    |
|                                                     | Gastrointestinal                                                             | Metoclopramide: not applied, as clinical was needed<br>Mineral oil: applied<br>Proton-pump inhibitors: applied, whenever as possible to confirm >8 weeks treatment |
|                                                     | Pain medications                                                             | Applied                                                                                                                                                            |
|                                                     | Genitourinary                                                                | Not applied, as clinical was needed                                                                                                                                |

Table S2. Application of the EU (7) -PIM list for the portuguese reality.

| Medicines                                                                                    | Application of Criteria                                         |
|----------------------------------------------------------------------------------------------|-----------------------------------------------------------------|
| Magnesium Hydroxide                                                                          | Applied                                                         |
| Aluminum compounds - Combinations and complexes of aluminum, calcium and magnesium compounds | Applied when dosage was available                               |
| Cimetidine                                                                                   | Applied                                                         |
| Ranitidine                                                                                   | Applied                                                         |
| Famotidine                                                                                   | Applied                                                         |
| Proton Bomb Inhibitors                                                                       | Applied when information about treatment duration was available |
| Mebeverine                                                                                   | Applied                                                         |
| Trimebutine                                                                                  | Applied                                                         |
| Otilonium Bromide                                                                            | Applied                                                         |
| Pinaverium                                                                                   | Applied                                                         |
| clidinium and psycholeptic                                                                   | Applied                                                         |
| Metoclopramide                                                                               | Applied                                                         |
| Domperidone (> 30 mg/d)                                                                      | Applied when information about treatment duration was available |
| Liquid Parafine                                                                              | Applied                                                         |
| Bisacodyl (> 3days)                                                                          | Applied when information about treatment duration was available |
| Senna glycosided                                                                             | Applied                                                         |
| Sodium picosulfate                                                                           | Applied                                                         |
| Prucalopride                                                                                 | Applied                                                         |
| Loperamide (> 2 days)                                                                        | Applied when information about treatment duration was available |
| Racecadotril                                                                                 | Applied when information about treatment duration was available |
| Insuline – only in "sliding scale"                                                           | Not applied as data not available                               |
| Glibenclamid                                                                                 | Applied                                                         |
| Glipizide                                                                                    | Applied when information about treatment duration was available |
| Glimepiride                                                                                  | Applied when information about treatment duration was available |
| Acarbose                                                                                     | Applied                                                         |
| Pioglitazone                                                                                 | Applied                                                         |
| Sitagliptin                                                                                  | Applied                                                         |
| Vildagliptin                                                                                 | Applied                                                         |
| Acenocumarol                                                                                 | Applied                                                         |
| Ticlopidine                                                                                  | Applied                                                         |
| Dipyridamole                                                                                 | Applied                                                         |
| Prasugrel                                                                                    | Applied                                                         |
| dabigatran etexilate                                                                         | Applied                                                         |
| Rivaroxaban                                                                                  | Applied when information about treatment duration was available |
| Apixaban                                                                                     | Applied                                                         |
| Iron bivalent, oral preparations (> 325 mg/d)                                                | Applied                                                         |
| Digoxin                                                                                      | Applied                                                         |
| Metildigoxin                                                                                 | Applied                                                         |
| Propafenone                                                                                  | Applied                                                         |
| Flecainide                                                                                   | Applied                                                         |
| Amiodarone                                                                                   | Applied                                                         |
| Dronedarone                                                                                  | Applied                                                         |
| Trimetazidine                                                                                | Applied                                                         |
| Ivabradine                                                                                   | Applied                                                         |
| Clonidine                                                                                    | Applied                                                         |
| Guanfacine                                                                                   | Applied                                                         |

|                                                                         |                                                                            |
|-------------------------------------------------------------------------|----------------------------------------------------------------------------|
| Moxonidin                                                               | Applied                                                                    |
| Rilmenidin                                                              | Applied                                                                    |
| Doxazosin                                                               | Applied                                                                    |
| Urapidil                                                                | Applied                                                                    |
| Spironolactone (> 25 mg/d)                                              | Applied                                                                    |
| Pentoxifylline                                                          | Applied                                                                    |
| Nicergoline                                                             | Applied                                                                    |
| Vinburnine                                                              | Applied                                                                    |
| Naftidrofurilo                                                          | Applied                                                                    |
| Hidrosmia                                                               | Applied                                                                    |
| Hesperidin + Ruscus aculeatus + ascorbic acid; Rutoside + ascorbic Acid | Applied                                                                    |
| Troloxerutin + Heparinoid                                               | Applied                                                                    |
| Propranolol                                                             | Applied                                                                    |
| Sotalol                                                                 | Applied                                                                    |
| Labetalol                                                               | Applied when information about treatment duration and dosage was available |
| Nifedipine                                                              | Applied                                                                    |
| Nifedipine (sustained release)                                          | Applied                                                                    |
| Verapamil                                                               | Applied                                                                    |
| Diltiazem                                                               | Applied                                                                    |
| Estrogens (oral)                                                        | Applied                                                                    |
| Flavoxate                                                               | Applied                                                                    |
| Oxybutynin                                                              | Applied                                                                    |
| Solifenacin                                                             | Applied                                                                    |
| Trospium chloride                                                       | Applied                                                                    |
| Darifenacin                                                             | Applied                                                                    |
| Fesoterodin                                                             | Applied                                                                    |
| Terazosin                                                               | Applied                                                                    |
| Ofloxacin                                                               | Applied                                                                    |
| Prulifloxacin                                                           | Applied                                                                    |
| Nitrofurantoin (> 1 week)                                               | Applied when information about treatment duration and dosage was available |
| Indomethacin                                                            | Applied                                                                    |
| Diclofenac                                                              | Applied                                                                    |
| Etodolac                                                                | Applied                                                                    |
| Acemetacin                                                              | Applied                                                                    |
| Ketorolac                                                               | Applied                                                                    |
| Aceclofenac                                                             | Applied                                                                    |
| Piroxicam                                                               | Applied                                                                    |
| Lornoxicam                                                              | Applied                                                                    |
| Meloxicam                                                               | Applied                                                                    |
| Ibuprofen (> 3 x 400 mg/d or > 1 week)                                  | Applied when information about treatment duration and dosage was available |
| Naproxen (>2 x 250 mg/d or > 1 week)                                    | Applied when information about treatment duration and dosage was available |
| Ketoprofen                                                              | Applied                                                                    |
| Flurbiprofen                                                            | Applied                                                                    |
| Dexetoprofen                                                            | Applied                                                                    |
| Acid mefenamic                                                          | Applied                                                                    |
| Celecoxib                                                               | Applied                                                                    |
| Etoricoxib                                                              | Applied when information about treatment duration and dosage was available |
| Nabumetone                                                              | Applied                                                                    |
| Nimesulide                                                              | Applied                                                                    |
| Baclofen                                                                | Applied when information about treatment duration and dosage was available |

|                                         |                                                                              |
|-----------------------------------------|------------------------------------------------------------------------------|
| Tizanidine                              | Applied                                                                      |
| Cyclobenzaprine                         | Applied when information about treatment duration and dosage was available   |
| Colicine                                | Applied                                                                      |
| Strontium ranelate                      | Applied                                                                      |
| Pethidine                               | Applied when information about treatment duration and dosage was available   |
| Tramadol                                | Applied when information about treatment duration and dosage was available   |
| Tramadol (sustained release)            | Applied when information about treatment duration and dosage was available   |
| Acetylsalicylic Acid (> 325 mg)         | Applied when information about dosage was available                          |
| Triptans                                | Applied when information about treatment duration and dosage was available   |
| Phenobarbital                           | Applied when information about treatment duration and dosage was available   |
| Phenytoin                               | Applied                                                                      |
| Clonazepam                              | Applied when information about dosage was available                          |
| Carbamazepine                           | Applied                                                                      |
| Topiramate                              | Applied                                                                      |
| Trihexyphenidyl                         | Applied                                                                      |
| Biperiden                               | Applied                                                                      |
| Amantadine                              | Applied when information about dosage was available                          |
| Bromocriptine                           | Applied                                                                      |
| dihydroergocryptine mesylate            | Applied                                                                      |
| Ropinirole                              | Applied when information about dosage was available                          |
| Pramipexol                              | Applied when information about treatment duration and dosage was available   |
| Piribedil                               | Applied                                                                      |
| Rotigotin                               | Applied when information about dosage was available                          |
| Selegiline                              | Applied when information about dosage was available                          |
| Chlorpromazine                          | Applied when information about dosage was available                          |
| Levomepromazine                         | Applied when information about dosage was available                          |
| Ciamemazin                              | Applied                                                                      |
| Haloperidol (> 2 mg unic dose; >5 mg/d) | Applied when information about dosage and administration route was available |
| Droperidol                              | Not applied as clinical information was needed                               |
| Ziprasidone                             | Applied when information about dosage was available                          |
| Flupentixol                             | Applied                                                                      |
| Zuclopenthixol                          | Applied when information about dosage and administration route was available |
| Pimozide                                | Applied when information about dosage was available                          |
| Clozapine                               | Applied when information about dosage was available                          |
| Olanzapine (> 10 mg/d)                  | Applied when information about dosage was available                          |
| Lithium                                 | Applied when information about dosage was available                          |
| Risperidone (> 6 weeks)                 | Applied when information about dosage and treatment duration was available   |
| Aripiprazole                            | Applied when information about dosage was available                          |
| Diazepam                                | Applied when information about dosage was available                          |
| Chlordiazepoxide                        | Applied when information about dosage was available                          |
| Oxazepam (> 60mg/d)                     | Applied when dosage was available                                            |
| potassium clorazepate                   | Applied when dosage was available                                            |
| Lorazepam (>1 mg/d)                     | Applied when dosage was available                                            |
| Bromazepam                              | Applied when dosage was available                                            |
| Clobazam                                | Applied when dosage was available                                            |
| Prazepam                                | Applied when dosage was available                                            |
| Alprazolam                              | Applied when dosage was available                                            |
| Ethyl loflazepate                       | Applied                                                                      |
| Cloxazolam                              | Applied                                                                      |
| Hydroxyzine                             | Applied when dosage was available                                            |
| Flurazepam                              | Applied when dosage was available                                            |

|                                |                                                                          |
|--------------------------------|--------------------------------------------------------------------------|
| Estazolam                      |                                                                          |
| Triazolam                      | Applied when dosage was available                                        |
| Temazepam                      | Applied when dosage was available                                        |
| Midazolam                      | Applied when dosage was available                                        |
| Brotizolam (> 0,125 mg/d)      | Applied when dosage was available                                        |
| Loprazolam (> 0,5 mg/d)        | Applied when dosage was available                                        |
| Zolpidem (> 5mg/d)             | Applied when dosage was available                                        |
| Imipramine                     | Applied when dosage was available                                        |
| Clomipramine                   | Applied when dosage was available                                        |
| Trimipramine                   | Applied when dosage was available                                        |
| Amitriptyline                  | Applied when dosage was available                                        |
| Nortriptyline                  | Applied when dosage was available                                        |
| Dosulepin                      | Applied when dosage was available                                        |
| Maprotiline                    | Applied                                                                  |
| Fluoxetine                     | Applied when dosage and/or treatment moment during the day was available |
| Paroxetine                     | Applied                                                                  |
| Fluvoxamine                    | Applied                                                                  |
| Bupropion                      | Applied                                                                  |
| Venlafaxine                    | Applied when dosage was available                                        |
| Reboxetine                     | Applied                                                                  |
| Methylphenidate                | Applied                                                                  |
| Pyritinol                      | Applied                                                                  |
| Piracetam                      | Applied                                                                  |
| Ginkgo biloba                  | Applied                                                                  |
| Methadone                      | Applied                                                                  |
| Teofiline                      | Applied                                                                  |
| Codeine (> 2 weeks)            | Applied                                                                  |
| Dextromethorphan               | Applied                                                                  |
| Diphenhydramine                | Applied                                                                  |
| Clemastine                     | Applied                                                                  |
| Doxylamine                     | Applied                                                                  |
| Dexchlorpheniramine            | Applied when dosage was available                                        |
| Dimetindene                    | Applied                                                                  |
| Promethazine                   | Applied                                                                  |
| Mequitazine                    | Applied                                                                  |
| Pseudoephedrine + Triprolidine | Applied                                                                  |
| Ebastin                        | Applied                                                                  |

**Table S3. Total Number of PIM Identified In The ADR Reports Received from patients 65 and more years old during 2019.**

| <b>ATC code</b> | <b>Criteria</b> | <b>DCI</b>                        | <b>N PIM</b> | <b>%</b> |
|-----------------|-----------------|-----------------------------------|--------------|----------|
| A02AB04         | EU (7)          | Dihydroxialumini sodium carbonate | 1            | 0,3%     |
| A02BA02         | EU (7)          | Ranitidine                        | 2            | 0,6%     |
| A02BC01         | EU (7) / Beers  | omeprazole                        | 3            | 0,9%     |
| A02BC02         | EU (7) / Beers  | pantoprazole                      | 2            | 0,6%     |
| A03AA04         | EU (7)          | mebeverine                        | 1            | 0,3%     |
| A03FA01         | EU (7)/Beers    | Metoclopramide                    | 3            | 0,9%     |
| A03FA03         | EU (7)          | Domperidone                       | 2            | 0,6%     |
| A07DA03         | EU (7)          | Loperamide (> 2 days)             | 1            | 0,3%     |
| A07XA04         | EU (7)          | racecadotril                      | 1            | 0,3%     |
| A10BB01         | Beers           | glibenclamide                     | 1            | 0,3%     |
| A10BF01         | EU (7)          | acarbose                          | 1            | 0,3%     |
| A10BG03         | EU (7)          | pioglitazone                      | 1            | 0,3%     |
| A10BH01         | EU (7)          | Sitagliptin                       | 2            | 0,6%     |
| A10BH02         | EU (7)          | vildagliptine                     | 6            | 1,8%     |
| B01AA07         | EU (7)          | acenocumarol                      | 7            | 2,1%     |
| B01AE07         | EU (7)          | Dabigatran etexilate              | 24           | 7,1%     |
| B01AF01         | EU (7)          | Rivaroxaban                       | 21           | 6,2%     |
| B01AF02         | EU (7)          | apixaban                          | 11           | 3,3%     |
| B03AA           | EU (7)          | Iron bivalent, oral preparations  | 1            | 0,3%     |
| C01AA05         | EU (7)/Beers    | Digoxin                           | 4            | 1,2%     |
| C01BC03         | EU (7)          | Propafenone                       | 1            | 0,3%     |
| C01BD01         | EU (7)/Beers    | Amiodarone                        | 34           | 10,1%    |
| C01EB15         | EU (7)          | Trimetazidine                     | 2            | 0,6%     |
| C01EB17         | EU (7)          | Ivabradine                        | 1            | 0,3%     |
| C02AC06         | EU (7)          | Rilmenidine                       | 1            | 0,3%     |
| C03DA01         | EU (7)          | Spironolactone (> 25 mg/day)      | 6            | 1,8%     |
| C04AD03         | EU (7)          | Pentoxifylline                    | 1            | 0,3%     |
| C04AX21         | EU (7)          | naftidrofuryl                     | 1            | 0,3%     |
| C05CA05         | EU (7)          | hidrosmin                         | 1            | 0,3%     |
| C05CA51         | EU (7)          | rutoside, combinations            | 1            | 0,3%     |
| C07AA05         | EU (7)          | Propranolol                       | 1            | 0,3%     |
| C08CA05         | EU (7)          | Nifedipine                        | 3            | 0,9%     |
| C08DA01         | EU (7)          | Verapamil                         | 1            | 0,3%     |
| G03C            | EU (7)          | Estrogens                         | 1            | 0,3%     |
| G04BD02         | EU (7)          | Flavoxate                         | 2            | 0,6%     |
| G04BD04         | EU (7)          | oxybutynin                        | 2            | 0,6%     |
| H01BA02         | Beers           | desmopressin                      | 1            | 0,3%     |
| J01XE01         | Beers           | Nitrofurantoin                    | 4            | 1,2%     |
| L02AB01         | Beers           | megestrol                         | 2            | 0,6%     |
| M01AB01         | EU (7)          | indometacin                       | 2            | 0,6%     |
| M01AB05         | EU (7) / Beers  | Diclofenac                        | 19           | 5,6%     |
| M01AB08         | EU (7)          | etodolac                          | 5            | 1,5%     |
| M01AB11         | EU (7)          | acemetacin                        | 1            | 0,3%     |

|         |                |                 |         |        |
|---------|----------------|-----------------|---------|--------|
| M01AB15 | EU (7)         | ketorolac       | 1       | 0,3%   |
| M01AC01 | EU (7)         | piroxicam       | 2       | 0,6%   |
| M01AE03 | EU (7)         | ketoprofen      | 2       | 0,6%   |
| M01AH01 | EU (7)         | celecoxib       | 2       | 0,6%   |
| M01AH05 | EU (7)         | etoricoxib      | 13      | 3,9%   |
| M01AX17 | EU (7)         | Nimesulide      | 1       | 0,3%   |
| M03BX01 | EU (7)         | Baclofen        | 3       | 0,9%   |
| M03BX08 | EU (7)         | cyclobenzapine  | 7       | 2,1%   |
| M04AC01 | EU (7)         | Colchicine      | 2       | 0,6%   |
| N02AX02 | EU (7)         | Tramadol        | 6       | 1,8%   |
| N03AA02 | EU (7) /Beers  | Phenobarbital   | 2       | 0,6%   |
| N03AE01 | EU (7) / Beers | Clonazepam      | 4       | 1,2%   |
| N03AF01 | EU (7)         | Carbamazepine   | 8       | 2,4%   |
| N03AX11 | EU (7)         | Topiramate      | 2       | 0,6%   |
| N04AA01 | EU (7)         | Trihexyphenidyl | 1       | 0,3%   |
| N04AA02 | EU (7)         | Biperiden       | 3       | 0,9%   |
| N04BC05 | EU (7)         | Pramipexole     | 2       | 0,6%   |
| N04BC09 | EU (7)         | Rotigotine      | 2       | 0,6%   |
| N05AA01 | EU (7) / Beers | Chlorpromazine  | 1       | 0,3%   |
| N05AA06 | EU (7)         | Cyamemazine     | 1       | 0,3%   |
| N05AD01 | Beers          | Haloperidol     | 12      | 3,6%   |
| N05AH02 | EU (7)         | Clozapine       | 3       | 0,9%   |
| N05AH03 | Beers          | Olanzapine      | 7       | 2,1%   |
| N05AN01 | EU (7)         | Lithium         | 4       | 1,2%   |
| N05AX12 | EU (7)         | Aripiprazole    | 1       | 0,3%   |
| N05BA01 | EU (7) / Beers | Diazepam        | 8       | 2,4%   |
| N05BA06 | EU (7) / Beers | Lorazepam       | 3       | 0,9%   |
| N05BA08 | EU (7) / Beers | Bromazepam      | 7       | 2,1%   |
| N05BA12 | EU (7) / Beers | Alprazolam      | 6       | 1,8%   |
| N05BA22 | EU (7)         | Cloxazolam      | 1       | 0,3%   |
| N05BB01 | EU (7) / Beers | Hydroxyzine     | 3       | 0,9%   |
| N05CD08 | EU (7)         | Midazolam       | 6       | 1,8%   |
| N05CF02 | Beers          | Zolpidem        | 2       | 0,6%   |
| N06AA04 | EU (7)         | Clomipramine    | 1       | 0,3%   |
| N06AA09 | EU (7) / Beers | Amitriptyline   | 3       | 0,9%   |
| N06AB03 | EU (7)         | Fluoxetine      | 6       | 1,8%   |
| N06AB05 | EU (7) / Beers | Paroxetine      | 2       | 0,6%   |
| N06AX12 | EU (7)         | Bupropion       | 2       | 0,6%   |
| N06AX16 | EU (7)         | Venlafaxine     | 4       | 1,2%   |
| R03DA04 | EU (7)         | Theophylline    | 1       | 0,3%   |
| R06AA09 | EU (7)         | doxylamine      | 1       | 0,3%   |
| R06AX22 | EU (7)         | ebastine        | 1       | 0,3%   |
|         |                |                 | N = 337 | 100,0% |



**Table S4. Groups / Medicines included in the PIM lists that did not fulfil the criteria due to lack of information to apply it.**

| <b>Group/Medicines</b>    | <b>ATC<br/>Identified In<br/>Database</b> | <b>N that<br/>fulfilled the<br/>Criteria</b> | <b>N that were not possible<br/>to apply the criteria</b> | <b>%<br/>fulfilled</b> |
|---------------------------|-------------------------------------------|----------------------------------------------|-----------------------------------------------------------|------------------------|
| Insulines                 | 94                                        | 0                                            | 94                                                        | 0%                     |
| Ibuprofen                 | 15                                        | 0                                            | 15                                                        | 0%                     |
| Naproxen                  | 9                                         | 0                                            | 9                                                         | 0%                     |
| Risperidone               | 10                                        | 0                                            | 10                                                        | 0%                     |
| Proton Pump<br>inhibitors | 33                                        | 5                                            | 28                                                        | 15%                    |
| Lorazepam                 | 6                                         | 3                                            | 3                                                         | 50%                    |
| Domperidone               | 2                                         | 2                                            | 0                                                         | 100%                   |
| Loperamide                | 1                                         | 1                                            | 0                                                         | 100%                   |
| Racecadotril              | 1                                         | 1                                            | 0                                                         | 100%                   |
| Rivaroxaban               | 21                                        | 21                                           | 0                                                         | 100%                   |
| Nitrofurantoin            | 4                                         | 4                                            | 0                                                         | 100%                   |
| Etoricoxib                | 13                                        | 13                                           | 0                                                         | 100%                   |
| Baclofen                  | 2                                         | 2                                            | 0                                                         | 100%                   |
| Cyclobenzaprine           | 7                                         | 7                                            | 0                                                         | 100%                   |
| Tramadol                  | 6                                         | 6                                            | 0                                                         | 100%                   |
| Phenobarbital             | 2                                         | 2                                            | 0                                                         | 100%                   |
| Clonazepam                | 4                                         | 4                                            | 0                                                         | 100%                   |
| Pramipexol                | 2                                         | 2                                            | 0                                                         | 100%                   |
| Rotigotin                 | 2                                         | 2                                            | 0                                                         | 100%                   |
| Haloperidol               | 12                                        | 12                                           | 0                                                         | 100%                   |
| Clozapine                 | 3                                         | 3                                            | 0                                                         | 100%                   |
| Olanzapine                | 6                                         | 6                                            | 0                                                         | 100%                   |
| Lithium                   | 4                                         | 4                                            | 0                                                         | 100%                   |
| Aripiprazole              | 1                                         | 1                                            | 0                                                         | 100%                   |
| Diazepam                  | 8                                         | 8                                            | 0                                                         | 100%                   |
| Bromazepam                | 7                                         | 7                                            | 0                                                         | 100%                   |
| Alprazolam                | 5                                         | 5                                            | 0                                                         | 100%                   |
| Hydroxyzine               | 3                                         | 3                                            | 0                                                         | 100%                   |
| Midazolam                 | 6                                         | 6                                            | 0                                                         | 100%                   |
| Zolpidem                  | 3                                         | 3                                            | 0                                                         | 100%                   |
| Nortriptyline             | 3                                         | 3                                            | 0                                                         | 100%                   |
| Fluoxetine                | 6                                         | 6                                            | 0                                                         | 100%                   |
| Venlafaxine               | 4                                         | 4                                            | 0                                                         | 100%                   |
|                           |                                           |                                              | Total = 159                                               |                        |
